# Supplementary material
Source: Springer Nature journal article supplement (https://www.springermedizin.de/resource/supplementary/13221_2012_49_MOESM1_ESM.pdf/9680884)

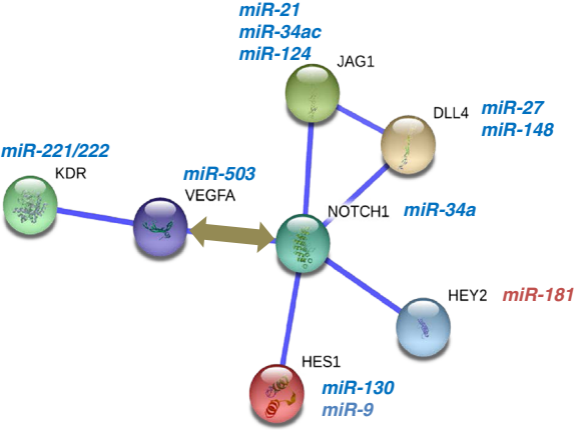

Supplement: MOESM1 [file 9680884]
